# Supplementary material
Source: Springer Nature journal article supplement (https://www.springermedizin.de/resource/supplementary/12885_2010_2522_MOESM1_ESM.pdf/9461946)
Supplement: MOESM1 [file 9461946]

Patients diagnosed with breast cancer  
N= 35,912  
Median age=62.3 years

No bone metastases  
n=35,690 (99.4%)  
Median age=62.2 years

Bone metastases present  
n= 176 (0.5%)  
Median age=68.7 years

Bone metastases and SRE present  
n=46 (0.1%)  
Median age=67.4 years

Developed bone metastases  
n=1,272  
Median age=62.6 years

Developed SREs  
n=76  
Median age=67.3 years

Developed SREs  
n=590  
Median age=63.4 years
